# Supplementary material for: Post-graduation migration intentions of students of Lebanese medical schools: a survey study
Source: BMC Public Health. 2008 Jun 2;8:191. doi: 10.1186/1471-2458-8-191 (PMC2424042; doi:10.1186/1471-2458-8-191)
Supplement: Additional file 2 — Survey questionnaire [file 1471-2458-8-191-S2.doc]

Additional file 2: Survey questionnaire

***Student Characteristics***

1. **Your age** (Please circle the right answer)

<21 21 22 23 24 25 26 27 28 29 30

31 32 33 34 35 36 37 38 39 40 >40

1. **Gender**

 1. Female  2. Male

1. **Marital status**

 1. Single  2. Married  3. Divorced  4. Widow

1. **Religion: _____________________**
2. **Lebanese Citizenship**

 1. Yes  2. No. Citizenship: ______________

1. **Do you have a 2nd citizenship or permanent residency?**

 1. No  2. Yes. Country: ­­­­­­­­­­­­­­­­­­­________________

1. **Year of Medical School**

 1. Pre-final year  2. Final year

1. **Your estimated overall ranking in class**

 1. Top 1/3  2. Middle 1/3  3. Bottom 1/3

1. **What type of residency training do you plan to do?** *(check only one)*

 1. None. I desire to be a general practitioner  2. Surgical

 3. Medical  4. Other: __________

1. **How would you rate your socio-economic status?**

 1. Lower  2. Lower middle  3. Upper middle  4. Upper

***Abroad training***

1. **Do you intend to do your training abroad?**

 1. No

 2. Yes, for specialty training

 3. Yes, for subspecialty training, after completing specialty training in Lebanon

1. **If “yes” to q.10, what country would be your first choice?** *(check only one)*

 1. United Kingdom  2. Canada

 3. France  4. United States  5. Other: __________

1. **If “yes” to q.10, what is your intention after you finish training abroad?** *(check only one)*

 1. Return directly to Lebanon

 2. Work abroad for less than 5 years then return to Lebanon

 3. Work abroad for 5-10 years then return to Lebanon

 4. Work abroad for more than 10 years then return to Lebanon

 5. Never return to Lebanon

1. **If “yes” to q.10, which is the most important goal for you to achieve through training abroad** *(check only one)*

 1. Excel professionally

 2. Prosper financially

 3. Establish myself quickly

 4. Achieve long-term stability and security

 5. Keep options open in terms of working in or outside Lebanon

 6. Obtain the citizenship of the country of training

 7. Other:___________________­­­­­­­­­­­­­­­­­­­­­­­­­­­­­­­­­________

1. **What are the barriers for you to train abroad?** *(check all that apply)*

 1. Required process of certification (exams and tests)

 2. Expenses (exams, applications, traveling)

 3. Getting visas

 4. Other:___________________­­­­­­­­­­­­­­­­­­­­­­­­­­­­­­­­­­­­­­­­­­­­­­­­­­­________

***Influencing Factors***

1. **Do you have family members or friends living abroad who would assist you if you travel to train abroad?**

 1. Yes  2. No

1. **Are there doctors in your university that encourage you to train abroad?**

 1. Yes  2. No

1. **Are there doctors in your university that would assist you to travel and train abroad?**

 1. Yes  2. No

1. **Does witnessing residents traveling to retrain abroad motivate you to train abroad yourself?**

 1. Yes  2. No

1. **Have you completed an observership or an elective rotation abroad?**

 1. Yes, country: ­­­­­­­­­­­­­­­­­­­­­­­­­­­­­ ______________

 2. No, but I am planning to, Country: ­­­­­­­______________

 3. No, and I am not planning to

1. **From where did you get your information about training abroad?** *(check all that apply)*

 1. Media (movies, TV series)

 2. Reports by family members or friends living abroad

 3. Reports by medical students who completed observership or elective abroad

 4. Reports by doctors who trained or are training abroad

 5. By comparing doctors trained locally to those trained abroad

 6. My own observations while on observership or elective abroad

 7. Other:___________________­­­­­­­­­­­­­­­­­­­­­­­­­­­­­­­­­________

1. **Do you agree that the Lebanese society expects you to train abroad? *(circle one number)***

| - 3 | - 2 | -1 | 0 | +1 | +2 | +3 |
| --- | --- | --- | --- | --- | --- | --- |
| I strongly disagree |  |  | I neither agree or disagree |  |  | I strongly agree |

1. **Which of the following groups in the population consider doctors trained abroad as more qualified than doctors trained in Lebanon?** *(check all that apply)*

 1. General public  2. Patients

 3. Academic community  4. Healthcare institutions

 5. I personally consider so  6. None of the above

1. Rate the impact of each of the factors listed below on your motivation to train abroad using the following scale:

| - 3 | - 2 | -1 | 0 | +1 | +2 | +3 |
| --- | --- | --- | --- | --- | --- | --- |
| I strongly disagree |  |  | I neither agree or disagree |  |  | I strongly agree |

*Factors related to residency training*

| 1. **Residency training opportunities**   Availability of desired specialty, intensity & fairness of competition | -3 -2 -1 0 +1 +2 +3 |
| --- | --- |
| 1. **Clinical training**   Exposure to cases, learning procedures, autonomy, application of theoretical learning | -3 -2 -1 0 +1 +2 +3 |
| 1. **Research training**   Financial resources, mentorship, possibility to publish | -3 -2 -1 0 +1 +2 +3 |
| 1. **Teaching in residency programs**   Doctors’ and programs’ commitment to teaching, presence of a curriculum | -3 -2 -1 0 +1 +2 +3 |
| 1. **Working conditions of residents**   Amount of work, relationship with doctors and nurses, rewarding and evaluation systems | -3 -2 -1 0 +1 +2 +3 |
| 1. **Financial situation of residents**   Income, financial independency, ability to start a family | -3 -2 -1 0 +1 +2 +3 |
| 1. **Impact of residency training on future career**   Ability to enter job market in Lebanon or abroad, chance of an academic career | -3 -2 -1 0 +1 +2 +3 |

*Factors related to working as a doctor*

| 1. **Job opportunities**   Intensity and fairness of competition, academic career opportunity, ability to work in your specialty of training | -3 -2 -1 0 +1 +2 +3 |
| --- | --- |
| 1. **Working conditions of doctors**   Amount of work, professional standards, advancement, continuous medical education | -3 -2 -1 0 +1 +2 +3 |
| 1. **Financial situation of doctors**   Income, stability of income | -3 -2 -1 0 +1 +2 +3 |

*Other factors*

| 1. **Personal conditions**   Issues related to partner, parents, children | -3 -2 -1 0 +1 +2 +3 |
| --- | --- |
| 1. **Social conditions**   Social norms, social system, social relationships, social and family support, lifestyle, living dependently or independently | -3 -2 -1 0 +1 +2 +3 |
| 1. **Political conditions**   Political situation, political system, ability to make changes, personal security | -3 -2 -1 0 +1 +2 +3 |

1. Any comments? ___________________________________________________________
